# Supplementary material for: SARS-CoV-2 genomic surveillance from community-distributed rapid antigen tests
Source: bioRxiv or medRxiv preprint supplement (doi:10.1101/2024.08.12.24311680), 2024-11-26
Supplement: Supplementary file [file media-1.pdf]

Supplementary Table 1. List of accession numbers for Genbank and SRA and virus names for GISAID to access the rapid antigen test sequences generated as part of our library rapid antigen test community surveillance program

| Internal ID  | SRA accession number | Genbank accession number | GISAID virus name            |
|--------------|----------------------|--------------------------|------------------------------|
| ATX2RLNE3M_2 | SAMN40752681         | PP761650                 | hCoV-19/USA/WI-UW-15394/2023 |
| ATAC3S9AX4_2 | SAMN40752680         | PP761651                 | hCoV-19/USA/WI-UW-15393/2023 |
| AT25TA545F_2 | SAMN40752679         | PP761655                 | hCoV-19/USA/WI-UW-15392/2023 |
| ATKCP10YMU_2 | SAMN40752678         | PP761653                 | hCoV-19/USA/WI-UW-15391/2023 |
| ATRUPA5DJ5_2 | SAMN40752677         |                          | hCoV-19/USA/WI-UW-15390/2023 |
| ATGRM0X3NG_2 | SAMN40752676         | PP761657                 | hCoV-19/USA/WI-UW-15389/2023 |
| ATQC4UXFHL_2 | SAMN40752675         | PP761658                 | hCoV-19/USA/WI-UW-15388/2023 |
| ATX2RLNE3M_1 | SAMN40752674         | PP761649                 | hCoV-19/USA/WI-UW-15387/2023 |
| ATAC3S9AX4_1 | SAMN40752673         | PP761647                 | hCoV-19/USA/WI-UW-15386/2023 |
| AT25TA545F_1 | SAMN40752672         | PP761652                 | hCoV-19/USA/WI-UW-15385/2023 |
| ATKCP10YMU_1 | SAMN40752671         | PP761659                 | hCoV-19/USA/WI-UW-15384/2023 |
| ATRUPA5DJ5_1 | SAMN40752670         |                          | hCoV-19/USA/WI-UW-15383/2023 |
| ATFFPBDGC7_1 | SAMN40752669         | PP761648                 | hCoV-19/USA/WI-UW-15382/2023 |
| ATGRM0X3NG_1 | SAMN40752668         | PP761654                 | hCoV-19/USA/WI-UW-15381/2023 |
| ATQC4UXFHL_1 | SAMN40752667         | PP761656                 | hCoV-19/USA/WI-UW-15380/2023 |
| ATM6YA1R0Z   | SAMN40752666         | PP747776                 | hCoV-19/USA/WI-UW-15517/2023 |
| No-barcode-8 | SAMN40752665         | PP747769                 | hCoV-19/USA/WI-UW-15516/2024 |
| No-barcode-7 | SAMN40752664         | PP747798                 | hCoV-19/USA/WI-UW-15515/2024 |
| ATWXMLXGNP   | SAMN40752663         | PP747708                 | hCoV-19/USA/WI-UW-15514/2024 |
| ATUB1RTN5L   | SAMN40752662         | PP747774                 | hCoV-19/USA/WI-UW-15513/2024 |
| ATSAO2XRUQ-2 | SAMN40752661         | PP747705                 | hCoV-19/USA/WI-UW-15512/2024 |
| ATSAO2XRUQ-1 | SAMN40752660         | PP747696                 | hCoV-19/USA/WI-UW-15511/2024 |
| ATRV2XAYT    | SAMN40752659         | PP747764                 | hCoV-19/USA/WI-UW-15510/2024 |
| ATPDSVRWH9   | SAMN40752658         | PP747781                 | hCoV-19/USA/WI-UW-15509/2024 |
| ATPAVSLTVZ   | SAMN40752657         | PP747743                 | hCoV-19/USA/WI-UW-15508/2024 |
| ATOMINHMVO   | SAMN40752656         | PP747702                 | hCoV-19/USA/WI-UW-15507/2024 |
| ATOI9WCZ81   | SAMN40752655         | PP747775                 | hCoV-19/USA/WI-UW-15506/2024 |
| ATODO9Q9H0   | SAMN40752654         | PP747730                 | hCoV-19/USA/WI-UW-15505/2024 |
| ATO4IQDBLG   | SAMN40752653         | PP747734                 | hCoV-19/USA/WI-UW-15504/2024 |
| ATN3EBDCSD   | SAMN40752652         | PP747733                 | hCoV-19/USA/WI-UW-15503/2024 |
| ATMBVXFJQN   | SAMN40752651         | PP747750                 | hCoV-19/USA/WI-UW-15502/2024 |
| ATKOAUDDAH-2 | SAMN40752650         | PP747765                 | hCoV-19/USA/WI-UW-15501/2024 |
| ATHX4ESJMU   | SAMN40752649         | PP747738                 | hCoV-19/USA/WI-UW-15500/2024 |
| ATHVKKGPO2   | SAMN40752648         | PP747700                 | hCoV-19/USA/WI-UW-15499/2024 |
| ATEZEING5R   | SAMN40752647         | PP747744                 | hCoV-19/USA/WI-UW-15498/2024 |
| ATDDTZIOII   | SAMN40752646         | PP747740                 | hCoV-19/USA/WI-UW-15497/2024 |
| AT7LKS02ZY   | SAMN40752645         | PP747770                 | hCoV-19/USA/WI-UW-15496/2024 |
| AT7H83A7O2   | SAMN40752644         | PP747711                 | hCoV-19/USA/WI-UW-15495/2024 |
| AT781XIB54   | SAMN40752643         | PP747701                 | hCoV-19/USA/WI-UW-15494/2024 |
| AT76LFJKEJ   | SAMN40752642         | PP747723                 | hCoV-19/USA/WI-UW-15493/2024 |
| AT4J6GKZJV   | SAMN40752641         | PP747693                 | hCoV-19/USA/WI-UW-15492/2024 |

## SARS-CoV-2 Rapid Antigen Test Genomic Surveillance

|                      |              |          |                              |
|----------------------|--------------|----------|------------------------------|
| AT4G966SRR           | SAMN40752640 | PP747749 | hCoV-19/USA/WI-UW-15491/2024 |
| AT4C6YKBZZ           | SAMN40752639 | PP747793 | hCoV-19/USA/WI-UW-15490/2024 |
| AT25WIBJFT           | SAMN40752638 | PP747697 | hCoV-19/USA/WI-UW-15489/2024 |
| AT0ERFB1HF           | SAMN40752637 | PP747698 | hCoV-19/USA/WI-UW-15488/2024 |
| AT0AWTMMKP           | SAMN40752636 | PP747760 | hCoV-19/USA/WI-UW-15487/2024 |
| AT05KGLKQ6           | SAMN40752635 | PP747692 | hCoV-19/USA/WI-UW-15486/2024 |
| ATFGKWPAZL           | SAMN40752634 | PP747796 | hCoV-19/USA/WI-UW-15485/2023 |
| NO-BARCODE-TIZZY     | SAMN40752633 | PP747762 | hCoV-19/USA/WI-UW-15484/2023 |
| No-BARCODE-7         | SAMN40752632 | PP747803 | hCoV-19/USA/WI-UW-15483/2023 |
| No-Barcode-5-ihealth | SAMN40752631 | PP747707 | hCoV-19/USA/WI-UW-15482/2023 |
| No-Barcode-5-BN      | SAMN40752630 | PP747800 | hCoV-19/USA/WI-UW-15481/2023 |
| ATPXOOQ032           | SAMN40752629 | PP747728 | hCoV-19/USA/WI-UW-15480/2023 |
| ATZ8EZY7IR           | SAMN40752628 | PP747782 | hCoV-19/USA/WI-UW-15479/2023 |
| ATZ0NRXDCK           | SAMN40752627 | PP747789 | hCoV-19/USA/WI-UW-15478/2023 |
| ATWJ2D0980           | SAMN40752626 | PP747742 | hCoV-19/USA/WI-UW-15477/2023 |
| ATUKMG6K7J           | SAMN40752625 | PP747785 | hCoV-19/USA/WI-UW-15476/2023 |
| ATPWR5IE4D           | SAMN40752624 | PP747695 | hCoV-19/USA/WI-UW-15475/2023 |
| ATPVOTRGYM           | SAMN40752623 | PP747802 | hCoV-19/USA/WI-UW-15474/2023 |
| ATNTDGQ0ZV           | SAMN40752622 | PP747778 | hCoV-19/USA/WI-UW-15473/2023 |
| ATM53BCTFV           | SAMN40752621 | PP747737 | hCoV-19/USA/WI-UW-15472/2023 |
| ATJR9OSFWD           | SAMN40752620 | PP747792 | hCoV-19/USA/WI-UW-15471/2023 |
| ATJ0KWF0TS           | SAMN40752619 | PP747739 | hCoV-19/USA/WI-UW-15470/2023 |
| ATFX9LZCHR           | SAMN40752618 | PP747713 | hCoV-19/USA/WI-UW-15469/2023 |
| ATCXJM1DBO           | SAMN40752617 | PP747790 | hCoV-19/USA/WI-UW-15468/2023 |
| ATBZPSGVAB           | SAMN40752616 | PP747795 | hCoV-19/USA/WI-UW-15467/2023 |
| AT96YQ9U13           | SAMN40752615 | PP747791 | hCoV-19/USA/WI-UW-15466/2023 |
| AT4VBM7WQH           | SAMN40752614 | PP747772 | hCoV-19/USA/WI-UW-15465/2023 |
| AT4J8ARPEG           | SAMN40752613 | PP747721 | hCoV-19/USA/WI-UW-15464/2023 |
| AT3ZC8GJPW           | SAMN40752612 | PP747767 | hCoV-19/USA/WI-UW-15463/2023 |
| AT0RH4DFUV           | SAMN40752611 | PP747779 | hCoV-19/USA/WI-UW-15462/2023 |
| No-barcode-4         | SAMN40752610 | PP747735 | hCoV-19/USA/WI-UW-15461/2023 |
| No-barcode-2         | SAMN40752609 | PP747717 | hCoV-19/USA/WI-UW-15460/2023 |
| ATZYNED0C2           | SAMN40752608 | PP747766 | hCoV-19/USA/WI-UW-15459/2023 |
| ATXXSAVO9F           | SAMN40752607 | PP747741 | hCoV-19/USA/WI-UW-15458/2023 |
| ATV6AW7859           | SAMN40752606 | PP747727 | hCoV-19/USA/WI-UW-15457/2023 |
| ATUZ85D2VU           | SAMN40752605 | PP747722 | hCoV-19/USA/WI-UW-15456/2023 |
| ATTYI7D5JH           | SAMN40752604 | PP747745 | hCoV-19/USA/WI-UW-15455/2023 |
| ATTYEJSDWY           | SAMN40752603 | PP747703 | hCoV-19/USA/WI-UW-15454/2023 |
| ATTVOS73K4           | SAMN40752602 | PP747694 | hCoV-19/USA/WI-UW-15453/2023 |
| ATSMWG98PK           | SAMN40752601 | PP747773 | hCoV-19/USA/WI-UW-15452/2023 |
| ATRX649RNA           | SAMN40752600 | PP747783 | hCoV-19/USA/WI-UW-15451/2023 |
| ATQN1DOYOX           | SAMN40752599 | PP747746 | hCoV-19/USA/WI-UW-15450/2023 |
| ATPDK4X5OH           | SAMN40752598 | PP747801 | hCoV-19/USA/WI-UW-15449/2023 |
| ATP8WMDMZK           | SAMN40752597 | PP747788 | hCoV-19/USA/WI-UW-15448/2023 |
| ATNTXE6UZQ           | SAMN40752596 | PP747756 | hCoV-19/USA/WI-UW-15447/2023 |

## SARS-CoV-2 Rapid Antigen Test Genomic Surveillance

|               |              |          |                              |
|---------------|--------------|----------|------------------------------|
| ATNB4UEUAK    | SAMN40752595 | PP747709 | hCoV-19/USA/WI-UW-15446/2023 |
| ATMYVE1QEK    | SAMN40752594 | PP747758 | hCoV-19/USA/WI-UW-15445/2023 |
| ATKR3E8K57    | SAMN40752593 | PP747768 | hCoV-19/USA/WI-UW-15444/2023 |
| ATJUCHFV8Z    | SAMN40752592 | PP747799 | hCoV-19/USA/WI-UW-15443/2023 |
| ATG75FDZ90    | SAMN40752591 | PP747780 | hCoV-19/USA/WI-UW-15442/2023 |
| ATG0HMTYYE    | SAMN40752590 | PP747754 | hCoV-19/USA/WI-UW-15441/2023 |
| ATEHBAOC25    | SAMN40752589 | PP747747 | hCoV-19/USA/WI-UW-15440/2023 |
| ATCZTKHDF4    | SAMN40752588 | PP747718 | hCoV-19/USA/WI-UW-15439/2023 |
| ATBW04JJJ9    | SAMN40752587 | PP747753 | hCoV-19/USA/WI-UW-15438/2023 |
| ATBH4IK27M    | SAMN40752586 | PP747716 | hCoV-19/USA/WI-UW-15437/2023 |
| ATALAP7D6L    | SAMN40752585 | PP747704 | hCoV-19/USA/WI-UW-15436/2023 |
| ATAJAL9JG4    | SAMN40752584 | PP747712 | hCoV-19/USA/WI-UW-15435/2023 |
| ATACET5NJ8    | SAMN40752583 | PP747763 | hCoV-19/USA/WI-UW-15434/2023 |
| ATA5WLTAK0    | SAMN40752582 | PP747757 | hCoV-19/USA/WI-UW-15433/2023 |
| AT9E5WUVE3    | SAMN40752581 | PP747751 | hCoV-19/USA/WI-UW-15432/2023 |
| AT8DP3WGHB    | SAMN40752580 | PP747706 | hCoV-19/USA/WI-UW-15431/2023 |
| AT5M1NUPQS    | SAMN40752579 | PP747719 | hCoV-19/USA/WI-UW-15430/2023 |
| AT1REAXVVZ    | SAMN40752578 | PP747804 | hCoV-19/USA/WI-UW-15429/2023 |
| AT9M50GXL5    | SAMN40752577 | PP747784 | hCoV-19/USA/WI-UW-15428/2023 |
| AT7V74R0RW    | SAMN40752576 | PP747715 | hCoV-19/USA/WI-UW-15427/2023 |
| ATHXJM6OTS    | SAMN40752575 | PP747794 | hCoV-19/USA/WI-UW-15426/2023 |
| AT7ZH839N8    | SAMN40752574 | PP747786 | hCoV-19/USA/WI-UW-15425/2023 |
| AT8X5RUNJL    | SAMN40752573 | PP747710 | hCoV-19/USA/WI-UW-15424/2023 |
| ATRBBD97CM    | SAMN40752572 | PP747736 | hCoV-19/USA/WI-UW-15423/2023 |
| ATF5O133LQ    | SAMN40752571 | PP747726 | hCoV-19/USA/WI-UW-15422/2023 |
| ATUQ7230RN    | SAMN40752570 | PP747731 | hCoV-19/USA/WI-UW-15421/2023 |
| AT0TFNDWZG    | SAMN40752569 | PP747724 | hCoV-19/USA/WI-UW-15420/2023 |
| ATCLJ5EIQG    | SAMN40752568 | PP747725 | hCoV-19/USA/WI-UW-15419/2023 |
| AT5UTIINHLL   | SAMN40752567 |          | hCoV-19/USA/WI-UW-15418/2023 |
| AT06HSAZ8J    | SAMN40752566 | PP747771 | hCoV-19/USA/WI-UW-15417/2023 |
| ATBSEDOKCN    | SAMN40752565 | PP747761 | hCoV-19/USA/WI-UW-15416/2023 |
| ATGRM0X3NG    | SAMN40752564 | PP747797 | hCoV-19/USA/WI-UW-15415/2023 |
| ATQC4UXFHL    | SAMN40752563 | PP747720 | hCoV-19/USA/WI-UW-15414/2023 |
| ATU2UEZGUU    | SAMN40752562 | PP747755 | hCoV-19/USA/WI-UW-15413/2023 |
| ATKCP10YMU    | SAMN40752561 | PP747787 | hCoV-19/USA/WI-UW-15412/2023 |
| ATRUPA5DJ5    | SAMN40752560 | PP747732 | hCoV-19/USA/WI-UW-15411/2023 |
| ATFFPBDG7     | SAMN40752559 | PP747777 | hCoV-19/USA/WI-UW-15410/2023 |
| AT25TA545F    | SAMN40752558 | PP747729 | hCoV-19/USA/WI-UW-15409/2023 |
| ATX2RLNE3M    | SAMN40752557 | PP747699 | hCoV-19/USA/WI-UW-15408/2023 |
| ATAC3S9AX4    | SAMN40752556 | PP747759 | hCoV-19/USA/WI-UW-15407/2023 |
| Lib-RAT-5-CC  | SAMN40752555 | PP747752 | hCoV-19/USA/WI-UW-15406/2023 |
| Lib-RAT-4-CC  | SAMN40752554 | PP747748 | hCoV-19/USA/WI-UW-15405/2023 |
| Lib-RAT-2-CC  | SAMN40752553 | PP747691 | hCoV-19/USA/WI-UW-15404/2023 |
| Lib-RAT-10-CC | SAMN40752552 | PP747714 | hCoV-19/USA/WI-UW-15403/2023 |
